# Supplementary material for: Low Coordination Water in COF and Acid-free Proton Conduction
Source: Royal Society of Chemistry journal article supplement (doi:10.1039/d5cc00471c), 2025-01-01
Supplement: d5cc00471c1.pdf [file d5cc00471c1.pdf]

## **Supplemental Information**

### **Low Coordination Water in COF and Acid-free Proton Conduction**

## 1. Materials

All chemicals and solvents used in the syntheses are reagent grade and used without further purification. 1,3,5-triformylbenzene and 2,5-diethoxyterephthalohydrazide were purchased from EXTENSION and TENSUS BIOTECH, respectively.

## 2. Synthesis

Self-standing and flexible COF membrane was prepared via interfacial polymerization reaction. 2,5-diethoxyterephthalohydrazide (42.2 mg, 0.15 mmol) was dissolved in 25 mL 6M acetic acid aqueous solution, and 1,3,5-triformylbenzene (16.2 mg, 0.1 mmol) were dissolved in 25 mL dichloromethane (DCM). Water phase was slowly dropped to the top of the organic phase. After that, the membrane-forming reaction takes place very quickly. The entire interface aggregation lasted for 3 days.

## 3. proton conductivity

The proton conduction measurements use one temperature and humidity control box and one Bio-Logic electrochemical workstation. The temperature and humidity control box can maintain humidity levels. The activation energy of proton conductivity ( $\sigma$ ) is fitted by Arrhenius equation:

$$\sigma T = A \exp\left(-\frac{E_a}{k_B T}\right) \quad (1)$$

where  $E_a$  is the transport activation energy,  $k_B$  is the Boltzmann constant,  $T$  is temperature, and  $A$  is a pre-exponential factor.

## 4. Computational details

The guest molecules of water in framework is simulated by Monte Carlo method with Dreiding forcefield. The cell size used for simulation is 1×1×1. Water molecules are saturatedly placed into the framework. The model of bulk water is established with a density of 1 g/cm<sup>3</sup>. Molecular dynamics simulation utilizes the Dynamics module in the Forcite Calculation panel, with the ensemble set to NPT.



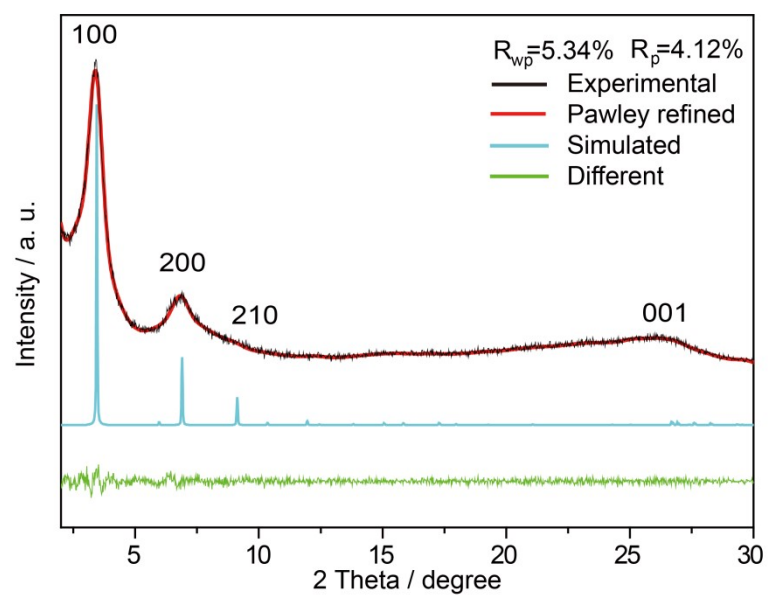

**Figure S1.** PXRD simulation of COF-42 membrane.

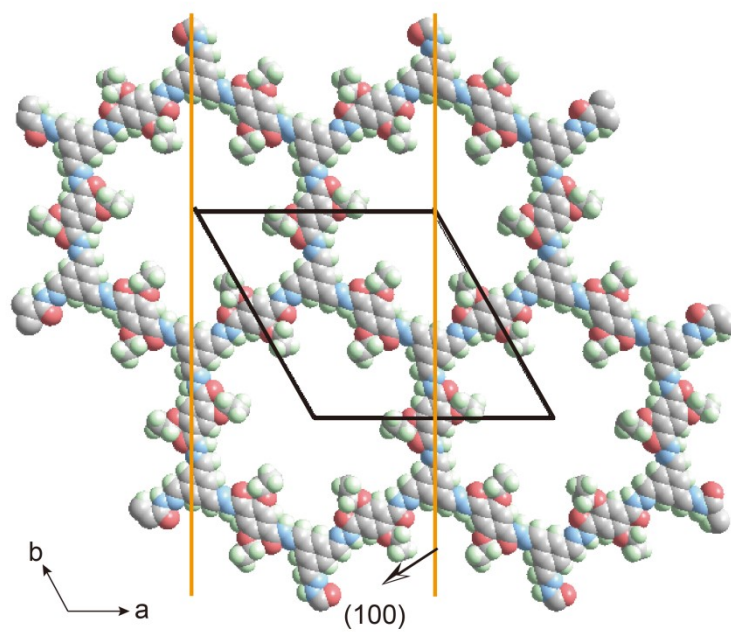

**Figure S2.** Structural model of COF-42 along c-axis with unit cell (black box), orientation displaying lattice plane (100) (orange).

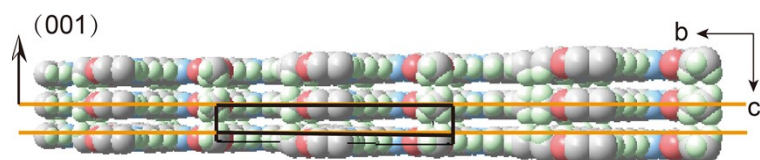

**Figure S3.** Structural model of COF-42 along a-axis with unit cell (black box), orientation displaying lattice plane (001) (orange).

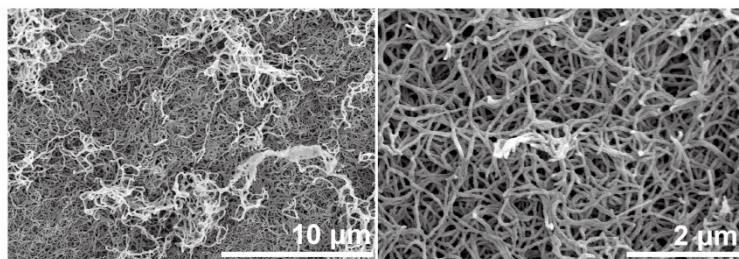

**Figure S4.** SEM photograph of COF-42-M with different rulers from front side.

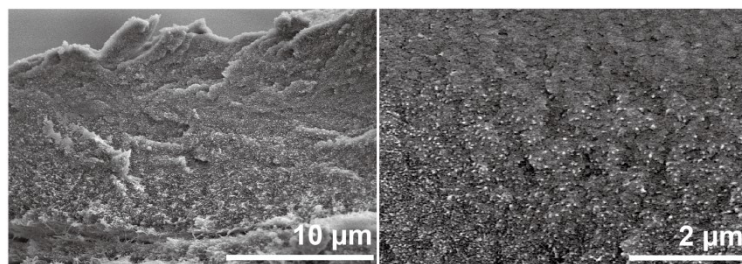

**Figure S5.** SEM photograph of COF-42-M(dry) with different rulers from section side.



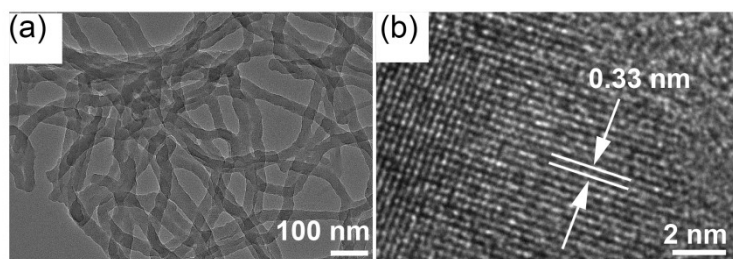

**Figure S6.** (a) TEM image of COF-42 membrane. (b) HR-TEM image of COF-42 membrane crystallite displaying the (001) plane, fringes represent  $\pi$ - $\pi$  stacking (0.33 nm).

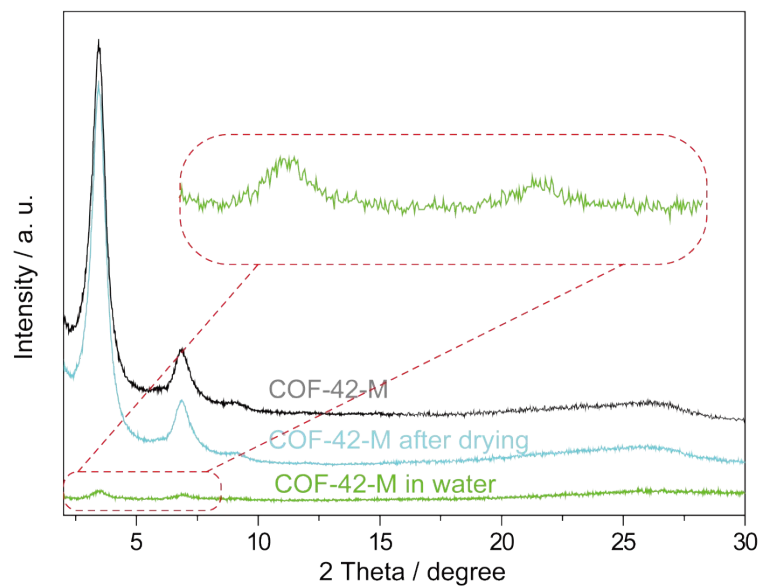

**Figure S7.** PXRD of COF-42-M in different conditions, with an inset showing the enlarged image.

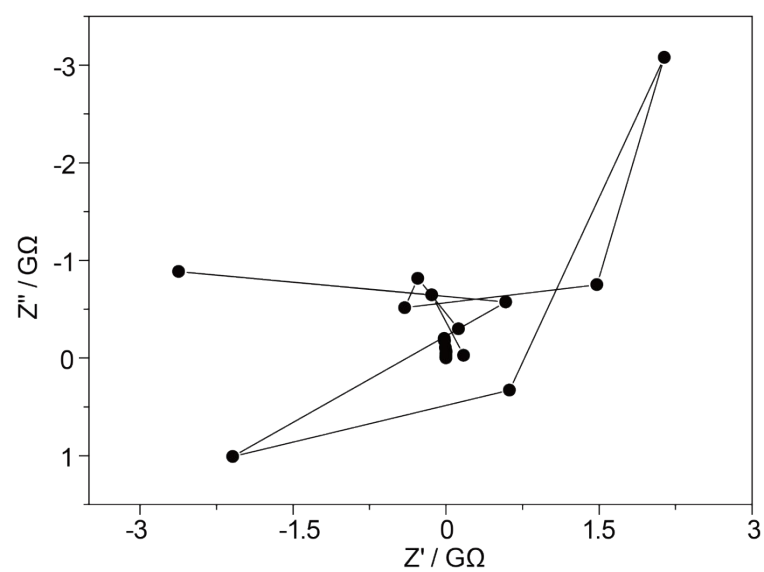

**Figure S8.** Nyquist plot of COF-42-M under 30 °C and nitrogen atmosphere.

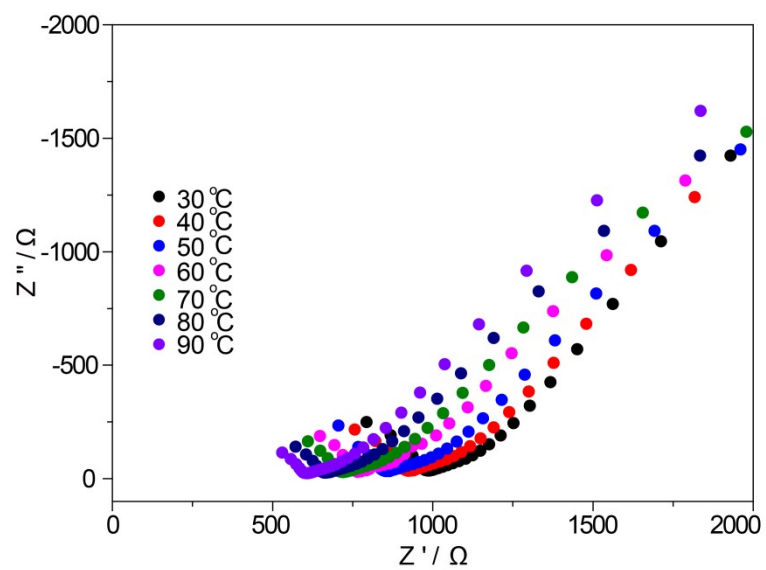

**Figure S9.** Nyquist plots of COF-42-M in water versus different temperatures.

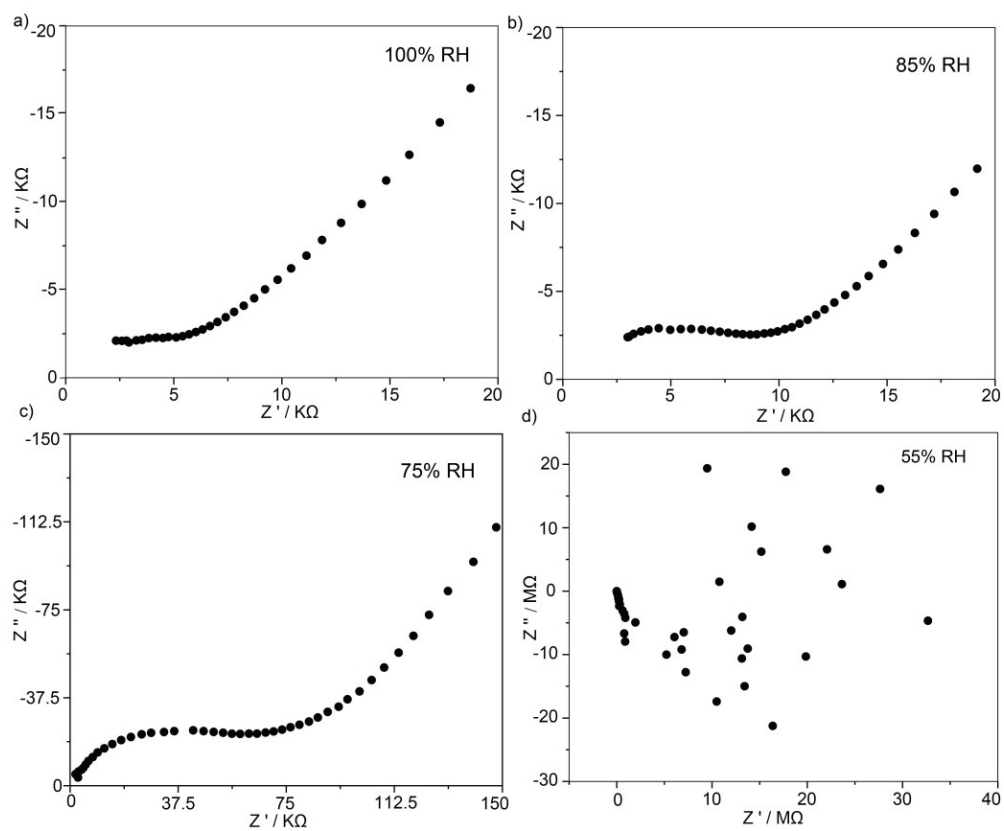

**Figure S10.** Nyquist plots of COF-42-M at different humidity.

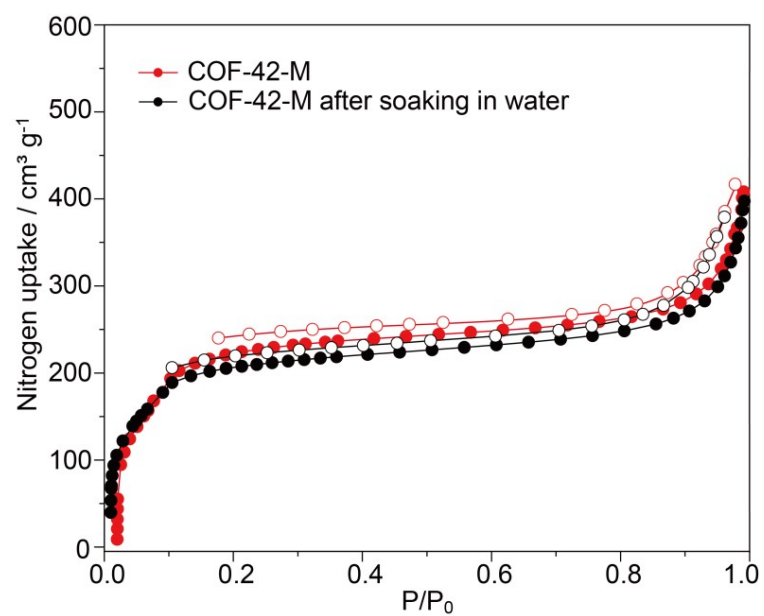

**Figure S11.** Nitrogen adsorption of COF-42-M before and after water immersion.

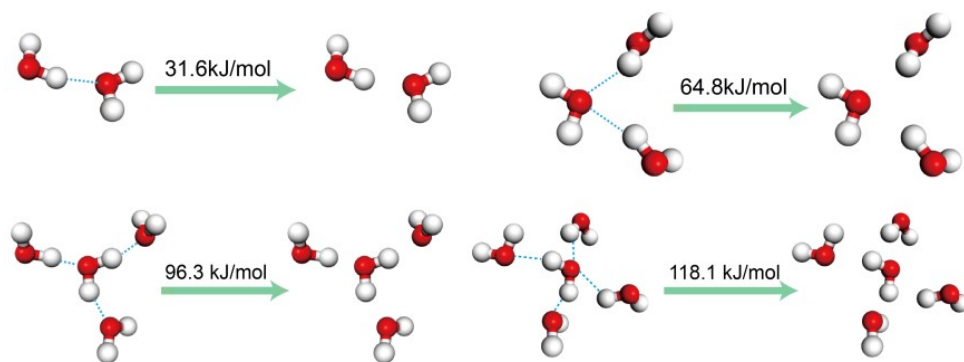

**Figure S12.** The H-bond breaking energy for water with different coordination numbers.

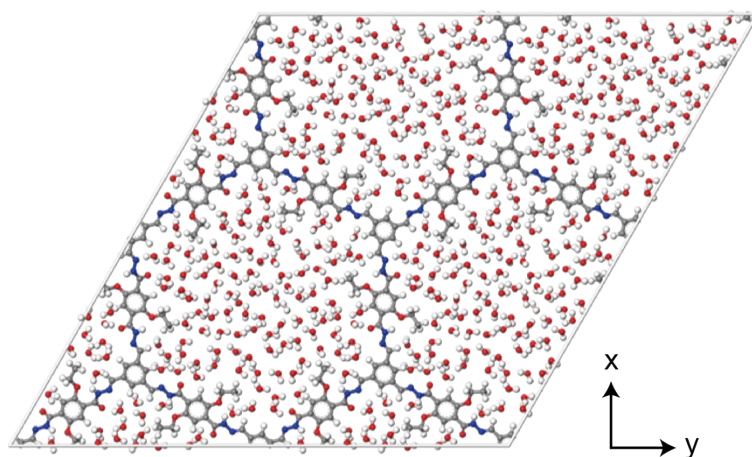

**Figure S13.** Model schematic diagram of COF-42-M with water.



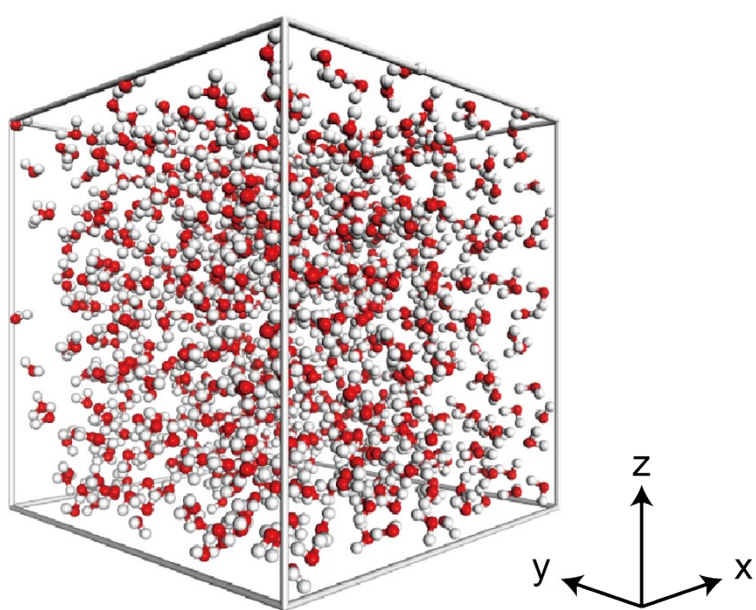

**Figure S14.** Model schematic diagram of bulk water.

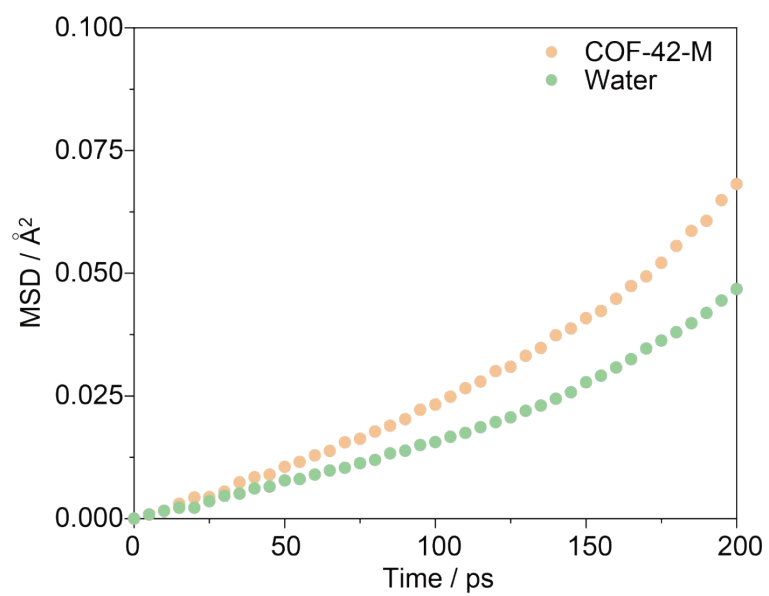

**Figure S15.** The results of MSD of COF-42-M and water.

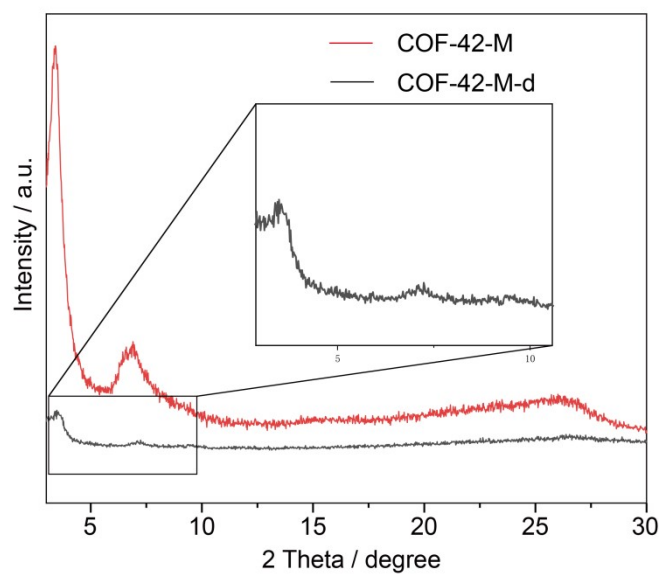

**Figure S16.** PXRD of COF-42-M and COF-42-M-d.

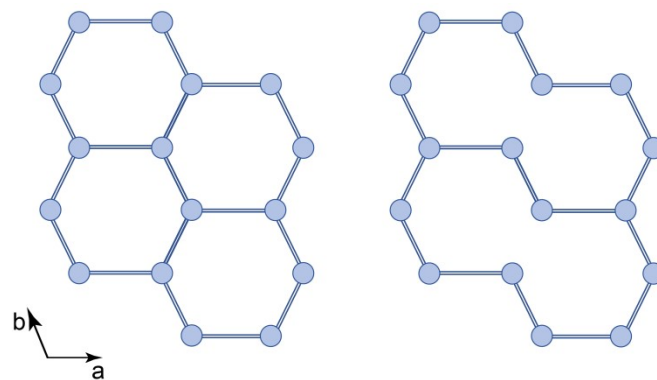

**Figure S17.** Structure diagram of COF-42-M and COF-42-M-d.

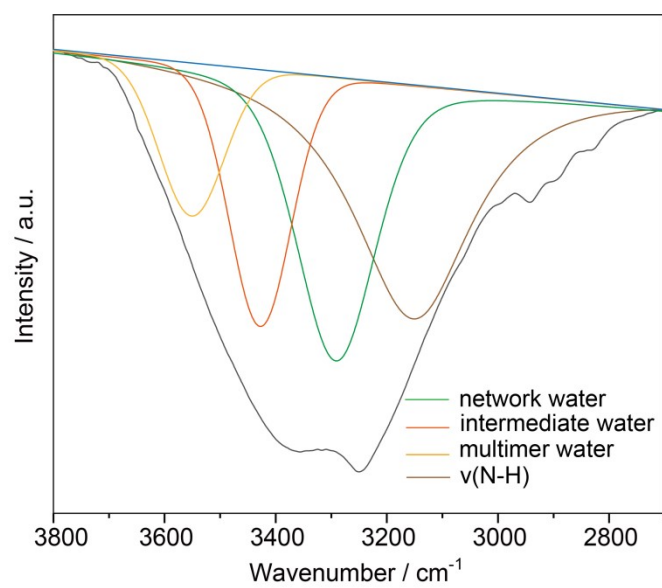

**Figure S18.** IR plot of COF-42-M-d with water.

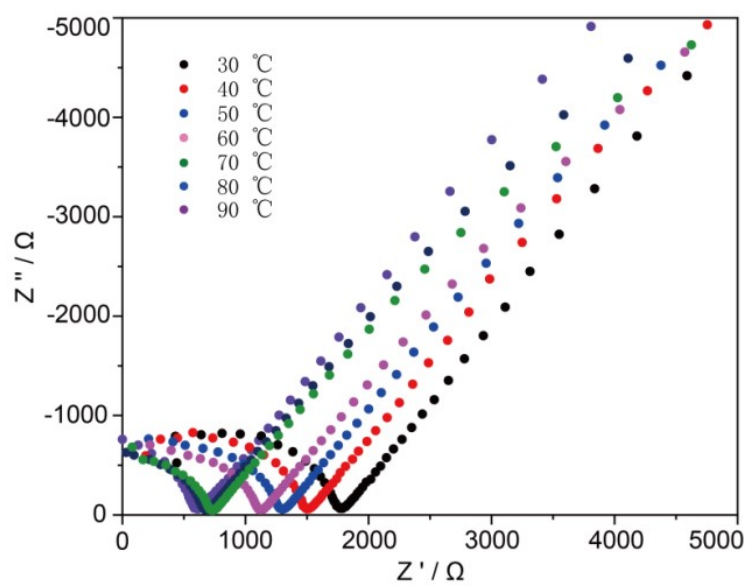

**Figure S19.** Nyquist plots of COF-42-M-d in water versus different temperatures.

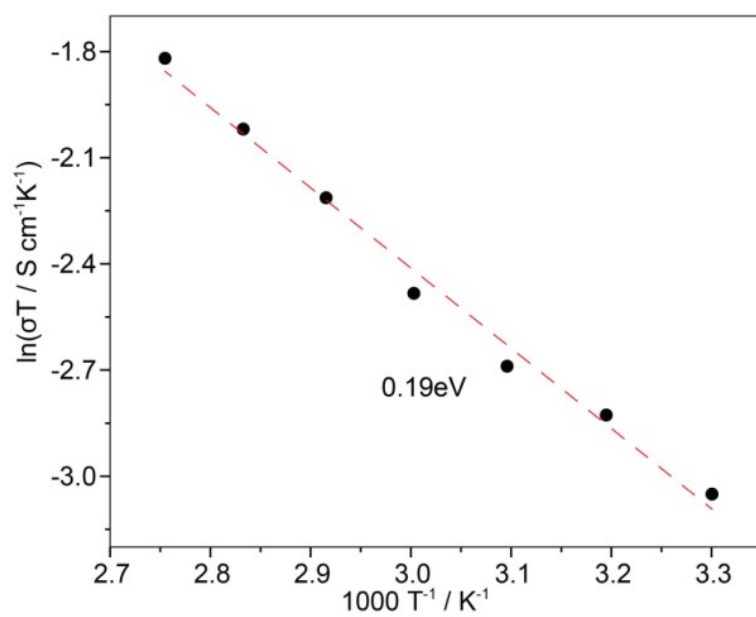

**Figure S20.** Arrhenius plot of COF-42-M-d.

**Table S1.** Summary of MOFs/COFs based proton conduction.

| Materials                                                                                             | $\sigma$ (S cm <sup>-1</sup> ) | Ea (eV) | Condition       | Ref.                                                                      |
|-------------------------------------------------------------------------------------------------------|--------------------------------|---------|-----------------|---------------------------------------------------------------------------|
| COF-42-M                                                                                              | $7.56 \times 10^{-4}$          | 0.11    | 90 °C, in water | This work                                                                 |
| (NH <sub>4</sub> ) <sub>3</sub> Zr(H <sub>2</sub> /3PO <sub>4</sub> ) <sub>3</sub>                    | $1.21 \times 10^{-2}$          | 0.26    | 90 °C, 95% RH   | <i>J. Am. Chem. Soc.</i> <b>2018</b> , <i>140</i> , 6146-6155.            |
| Im-Fe-MOF                                                                                             | $1.21 \times 10^{-2}$          | 0.436   | 60 °C, 98% RH   | <i>J. Am. Chem. Soc.</i> <b>2017</b> , <i>139</i> , 6183-9.               |
| (Me <sub>2</sub> NH <sub>2</sub> )[Eu(L)]                                                             | $3.76 \times 10^{-3}$          | 0.72    | 100 °C, 98% RH  | <i>J. Am. Chem. Soc.</i> <b>2017</b> , <i>139</i> , 3505-3512.            |
| Z-TpPa                                                                                                | $1.80 \times 10^{-1}$          | 0.20    | 98%             | <i>Small</i> . <b>2024</b> , <i>20</i> , 2308499.                         |
| MOF-74(Mg)-Urea                                                                                       | $2.64 \times 10^{-2}$          | 0.10    | 25 °C, 95% RH   | <i>J. Am. Chem. Soc.</i> <b>2020</b> , <i>142</i> , 6861-6865             |
| BUT-8(Cr)A                                                                                            | $1.27 \times 10^{-1}$          | 0.11    | 80 °C, 100% RH  | <i>Nature. Energy</i> . <b>2017</b> , <i>2</i> , 877-883.                 |
| SCOF                                                                                                  | $5.40 \times 10^{-1}$          | 0.19    | Pure water      | <i>Angew. Chem. Int. Ed. Engl.</i> <b>2021</b> , <i>60</i> , 14875-14880. |
| H <sub>3</sub> PO <sub>4</sub> @PyTFB-1-SO <sub>3</sub> H                                             | $1.15 \times 10^{-1}$          | 0.17    | 98%             | <i>Nano. Lett.</i> <b>2024</b> , <i>24</i> , 5075–5084.                   |
| HPW@TAPT-DHTA                                                                                         | $5.30 \times 10^{-1}$          | 0.15    | 80 °C, 100% RH  | <i>Angew. Chem. Int. Ed. Engl.</i> <b>2021</b> , <i>60</i> , 18051-18058. |
| SCOF membrane                                                                                         | $5.40 \times 10^{-1}$          | 0.19    | 80°C, in water  | <i>Angew. Chem. Int. Ed. Engl.</i> <b>2021</b> , <i>60</i> , 14875-14880. |
| H <sub>3</sub> PO <sub>4</sub> @GS-COF-2-COOH                                                         | $4.35 \times 10^{-2}$          | 0.21    | 80 °C, 90% RH   | <i>J. Am. Chem. Soc.</i> <b>2020</b> , <i>142</i> , 13316-13321.          |
| Aza-COF-2 <sub>H</sub>                                                                                | $4.80 \times 10^{-3}$          | 0.45    | 50 °C, 97% RH   | <i>Chem. Mater.</i> <b>2018</b> , <i>31</i> , 819-825.                    |
| BIP                                                                                                   | $3.20 \times 10^{-2}$          | 0.31    | 95 °C, 95% RH   | <i>J. Am. Chem. Soc.</i> <b>2019</b> , <i>141</i> , 14950-14954.          |
| KAUST-7'                                                                                              | $2.00 \times 10^{-2}$          | 0.19    | 90 °C, 95% RH   | <i>J. Am. Chem. Soc.</i> <b>2018</b> , <i>140</i> , 13156-13160.          |
| Fe <sup>III</sup> <sub>4</sub> [Fe <sup>II</sup> (CN) <sub>6</sub> ] <sub>3</sub> ·15H <sub>2</sub> O | $1.31 \times 10^{-1}$          | 0.26    | 25 °C, 95% RH   | <i>Angew. Chem. Int. Ed. Engl.</i> <b>2017</b> , 5531-5535.               |
| MIP-202(Zr)                                                                                           | $1.10 \times 10^{-2}$          | 0.22    | 90 °C, 95% RH   | <i>Nat. Commun.</i> <b>2018</b> , <i>9</i> , 4937.                        |
| [Pt(dach)(bpy)Br] <sub>4</sub> (SO <sub>4</sub> ) <sub>4</sub> ·32H <sub>2</sub> O                    | $1.72 \times 10^{-2}$          | 0.22    | 55 °C, 95% RH   | <i>Nat. Commun.</i> <b>2020</b> , <i>11</i> , 843.                        |



**Table S2.** Elemental analysis of different samples.

| Sample                          | C      | H     | O      | N      | C/N  |
|---------------------------------|--------|-------|--------|--------|------|
| COF-M-42 before water immersion | 55.34% | 5.64% | 24.59% | 14.35% | 3.86 |
| COF-M-42 after water immersion  | 51.82% | 5.95% | 28.12% | 13.22% | 3.92 |
| COF-42-M-d                      | 45.07% | 6.01% | 33.05% | 15.77% | 2.86 |
